# Supplementary material for: Development and Validation of a Score to Predict Acute Care Use After Initiation of Systemic Therapy for Cancer
Source: PubMed Central journal article supplement (PMC6802230; doi:10.1001/jamanetworkopen.2019.12823), 2019-10-09
Supplement: jamanetwopen-2-e1912823-s001.pdf [file jamanetwopen-2-e1912823-s001.pdf]

## Supplementary Online Content

Grant RC, Moineddin R, Yao Z, Powis M, Kukreti V, Krzyzanowska MK.

Development and validation of a score to predict acute care use after initiation of systemic therapy for cancer. *JAMA Netw Open*. 2019;2(10):e1912823.

doi:10.1001/jamanetworkopen.2019.12823

**eTable.** Classification of Systemic Therapies by the Risk of an Emergency Department Visit or Hospitalization Within Thirty Days of Initiation of Treatment

This supplementary material has been provided by the authors to give readers additional information about their work.

**eTable.** Classification of Systemic Therapies by the Risk of an Emergency Department Visit or Hospitalization Within Thirty Days of Initiation of Treatment

| Cancer  | Regimen          | Patients in the development cohort | Patients with AC30 in the development cohort | Mean acute care visits in 30 days in the development cohort | Quintile | Patients in the validation cohort | Patients with AC30 in the validation cohort |
|---------|------------------|------------------------------------|----------------------------------------------|-------------------------------------------------------------|----------|-----------------------------------|---------------------------------------------|
| Anus    | FUMTMC(RT)       | 65                                 | 19                                           | 0.43                                                        | 4        | 96                                | 19                                          |
| Bladder | CISP(RT-W)       | 22                                 | 5                                            | 0.27                                                        | 2        | 23                                | 7                                           |
| Bladder | CISPGEMC         | 85                                 | 38                                           | 0.59                                                        | 5        | 171                               | 56                                          |
| Bladder | CRBP(RT)         | 23                                 | 5                                            | 0.26                                                        | 2        | 1                                 | 1                                           |
| Bladder | CRBPGEMC         | 37                                 | 16                                           | 0.65                                                        | 5        | 62                                | 25                                          |
| Bladder | FUMTMC(RT)       | 16                                 | 4                                            | 0.25                                                        | 2        | 8                                 | 4                                           |
| Bladder | MVAC(HD)         | 21                                 | 3                                            | 0.14                                                        | 1        | 8                                 | 3                                           |
| Brain   | LOMU             | 22                                 | 9                                            | 0.59                                                        | 5        | 44                                | 11                                          |
| Brain   | TMZL             | 178                                | 33                                           | 0.26                                                        | 2        | 262                               | 59                                          |
| Brain   | TMZL(RT)-TMZL    | 202                                | 35                                           | 0.24                                                        | 2        | 124                               | 21                                          |
| Breast  | AC               | 98                                 | 24                                           | 0.38                                                        | 3        | 116                               | 28                                          |
| Breast  | AC-DOCE          | 45                                 | 11                                           | 0.29                                                        | 2        | 19                                | 8                                           |
| Breast  | AC-PACL          | 53                                 | 12                                           | 0.25                                                        | 2        | 27                                | 11                                          |
| Breast  | AC-PACL(DD)      | 534                                | 107                                          | 0.26                                                        | 2        | 414                               | 91                                          |
| Breast  | AC-PACL(DD)+TRAS | 17                                 | 2                                            | 0.18                                                        | 1        | 31                                | 3                                           |
| Breast  | AC-PACL(W)       | 54                                 | 11                                           | 0.22                                                        | 2        | 92                                | 36                                          |
| Breast  | AC-PACL(W)+TRAS  | 22                                 | 4                                            | 0.23                                                        | 2        | 23                                | 7                                           |
| Breast  | CAPE             | 200                                | 43                                           | 0.28                                                        | 2        | 201                               | 37                                          |
| Breast  | CAPELAPA         | 10                                 | 0                                            | 0.00                                                        | 1        | 9                                 | 2                                           |
| Breast  | CISPGEMC(W)      | 15                                 | 5                                            | 0.33                                                        | 3        | 39                                | 9                                           |
| Breast  | CRBPDOCETRAS     | 21                                 | 3                                            | 0.14                                                        | 1        | 35                                | 11                                          |
| Breast  | CYCLDOCE         | 270                                | 73                                           | 0.35                                                        | 3        | 412                               | 125                                         |
| Breast  | CYCLDOCE+TRAS    | 41                                 | 6                                            | 0.22                                                        | 2        | 66                                | 21                                          |
| Breast  | DOCE             | 39                                 | 21                                           | 0.69                                                        | 5        | 32                                | 10                                          |

| Cancer                       | Regimen           | Patients in the development cohort | Patients with AC30 in the development cohort | Mean acute care visits in 30 days in the development cohort | Quintile | Patients in the validation cohort | Patients with AC30 in the validation cohort |
|------------------------------|-------------------|------------------------------------|----------------------------------------------|-------------------------------------------------------------|----------|-----------------------------------|---------------------------------------------|
| Breast                       | DOCE+PERT+TRAS    | 15                                 | 7                                            | 0.73                                                        | 5        | 22                                | 5                                           |
| Breast                       | DOXO(W)           | 29                                 | 6                                            | 0.21                                                        | 2        | 19                                | 6                                           |
| Breast                       | ERIB              | 36                                 | 14                                           | 0.47                                                        | 4        | 48                                | 18                                          |
| Breast                       | EVEREXEM          | 44                                 | 6                                            | 0.18                                                        | 1        | 62                                | 17                                          |
| Breast                       | FEC-D             | 183                                | 39                                           | 0.27                                                        | 2        | 636                               | 155                                         |
| Breast                       | FEC-D+TRAS        | 65                                 | 13                                           | 0.22                                                        | 2        | 155                               | 45                                          |
| Breast                       | FEC100            | 153                                | 44                                           | 0.42                                                        | 3        | 144                               | 35                                          |
| Breast                       | FLVS              | 84                                 | 7                                            | 0.10                                                        | 1        | 103                               | 11                                          |
| Breast                       | KADC              | 41                                 | 7                                            | 0.17                                                        | 1        | 42                                | 10                                          |
| Breast                       | NPAC              | 14                                 | 5                                            | 0.36                                                        | 3        | 7                                 | 1                                           |
| Breast                       | PACL(W)           | 140                                | 39                                           | 0.35                                                        | 3        | 220                               | 50                                          |
| Breast                       | PACL(W)+PERT+TRAS | 13                                 | 1                                            | 0.15                                                        | 1        | 34                                | 11                                          |
| Breast                       | PACL(W)+TRAS      | 24                                 | 5                                            | 0.25                                                        | 2        | 52                                | 5                                           |
| Breast                       | PACL+PERT+TRAS    | 17                                 | 2                                            | 0.12                                                        | 1        | 25                                | 5                                           |
| Breast                       | PERT+TRAS         | 41                                 | 10                                           | 0.34                                                        | 3        | 40                                | 8                                           |
| Breast                       | TRAS              | 155                                | 29                                           | 0.23                                                        | 2        | 193                               | 21                                          |
| Breast                       | VINO              | 25                                 | 4                                            | 0.16                                                        | 1        | 57                                | 11                                          |
| Cervix                       | CISP(RT-W)        | 85                                 | 21                                           | 0.38                                                        | 3        | 120                               | 31                                          |
| Cervix                       | CISPPACL          | 10                                 | 1                                            | 0.20                                                        | 2        | 6                                 | 3                                           |
| Cervix                       | CRBPPACL          | 14                                 | 6                                            | 0.57                                                        | 5        | 27                                | 11                                          |
| Chronic Lymphocytic Leukemia | BEND              | 46                                 | 13                                           | 0.41                                                        | 3        | 43                                | 17                                          |
| Chronic Lymphocytic Leukemia | BEND+RITU         | 20                                 | 7                                            | 0.40                                                        | 3        | 20                                | 7                                           |
| Chronic Lymphocytic Leukemia | CHLO              | 34                                 | 6                                            | 0.24                                                        | 2        | 26                                | 4                                           |
| Chronic Lymphocytic Leukemia | FC(PO)+R          | 22                                 | 5                                            | 0.32                                                        | 3        | 11                                | 3                                           |
| Chronic Lymphocytic Leukemia | FC+R              | 48                                 | 12                                           | 0.27                                                        | 2        | 84                                | 19                                          |
| Chronic Lymphocytic Leukemia | FLUD(PO)+R        | 10                                 | 1                                            | 0.10                                                        | 1        | 6                                 | 3                                           |
| Chronic Lymphocytic Leukemia | IBRU              | 21                                 | 2                                            | 0.10                                                        | 1        | 41                                | 8                                           |

| Cancer           | Regimen         | Patients in the development cohort | Patients with AC30 in the development cohort | Mean acute care visits in 30 days in the development cohort | Quintile | Patients in the validation cohort | Patients with AC30 in the validation cohort |
|------------------|-----------------|------------------------------------|----------------------------------------------|-------------------------------------------------------------|----------|-----------------------------------|---------------------------------------------|
| Colorectal       | CAPE            | 473                                | 53                                           | 0.17                                                        | 1        | 437                               | 65                                          |
| Colorectal       | CAPE(RT)        | 158                                | 24                                           | 0.20                                                        | 2        | 274                               | 29                                          |
| Colorectal       | FOLFIRI         | 78                                 | 18                                           | 0.31                                                        | 3        | 128                               | 39                                          |
| Colorectal       | FOLFIRI+BEVA    | 361                                | 87                                           | 0.31                                                        | 3        | 510                               | 145                                         |
| Colorectal       | FU(CIV-RT)      | 27                                 | 1                                            | 0.04                                                        | 1        | 52                                | 8                                           |
| Colorectal       | IRIN            | 17                                 | 7                                            | 0.65                                                        | 5        | 7                                 | 4                                           |
| Colorectal       | IRIN(Q2W)+CETU  | 26                                 | 4                                            | 0.15                                                        | 1        | 12                                | 2                                           |
| Colorectal       | MFOLFOX6        | 564                                | 107                                          | 0.26                                                        | 2        | 845                               | 166                                         |
| Colorectal       | MFOLFOX6+BEVA   | 84                                 | 21                                           | 0.37                                                        | 3        | 62                                | 18                                          |
| Colorectal       | PNTM            | 29                                 | 5                                            | 0.24                                                        | 2        | 51                                | 14                                          |
| Colorectal       | REGO            | 20                                 | 3                                            | 0.20                                                        | 2        | 25                                | 6                                           |
| Colorectal       | XELOX           | 17                                 | 4                                            | 0.41                                                        | 3        | 19                                | 10                                          |
| Colorectal       | XELOX+BEVA      | 10                                 | 5                                            | 0.50                                                        | 4        | 4                                 | 1                                           |
| Sarcoma          | DOCEGEMC        | 11                                 | 9                                            | 1.00                                                        | 5        | 7                                 | 3                                           |
| Sarcoma          | DOXO            | 12                                 | 6                                            | 1.00                                                        | 5        | 37                                | 13                                          |
| Gastroesophageal | CAPECISP+TRAS   | 19                                 | 9                                            | 0.63                                                        | 5        | 18                                | 6                                           |
| Gastroesophageal | CISPFU          | 16                                 | 4                                            | 0.38                                                        | 3        | 40                                | 16                                          |
| Gastroesophageal | CISPFU+TRAS     | 18                                 | 9                                            | 0.56                                                        | 5        | 14                                | 6                                           |
| Gastroesophageal | CRBPPACL(RT)    | 78                                 | 15                                           | 0.28                                                        | 2        | 126                               | 32                                          |
| Gastroesophageal | ECARBOF         | 13                                 | 5                                            | 0.46                                                        | 4        | 6                                 | 3                                           |
| Gastroesophageal | ECF             | 124                                | 53                                           | 0.63                                                        | 5        | 173                               | 46                                          |
| Gastroesophageal | ECX             | 79                                 | 27                                           | 0.49                                                        | 4        | 83                                | 28                                          |
| Gastroesophageal | FULCVR(RT-GAST) | 29                                 | 7                                            | 0.31                                                        | 3        | 26                                | 6                                           |
| Gastroesophageal | PACL(W)         | 16                                 | 2                                            | 0.13                                                        | 1        | 26                                | 7                                           |
| Head and Neck    | CETU(RT)        | 11                                 | 3                                            | 0.36                                                        | 3        | 38                                | 19                                          |
| Head and Neck    | CISP(RT-W)      | 25                                 | 9                                            | 0.44                                                        | 4        | 36                                | 13                                          |
| Head and Neck    | CISP(RT)        | 150                                | 49                                           | 0.43                                                        | 4        | 171                               | 66                                          |

| Cancer                      | Regimen           | Patients in the development cohort | Patients with AC30 in the development cohort | Mean acute care visits in 30 days in the development cohort | Quintile | Patients in the validation cohort | Patients with AC30 in the validation cohort |
|-----------------------------|-------------------|------------------------------------|----------------------------------------------|-------------------------------------------------------------|----------|-----------------------------------|---------------------------------------------|
| Head and Neck               | CISPFU            | 21                                 | 7                                            | 0.43                                                        | 4        | 8                                 | 4                                           |
| Head and Neck               | CRBPFU(RT)        | 22                                 | 12                                           | 0.82                                                        | 5        | 2                                 | 1                                           |
| Head and Neck               | CRBPPACL          | 20                                 | 10                                           | 0.75                                                        | 5        | 26                                | 12                                          |
| Hepatobiliary               | CISPGEMC          | 34                                 | 19                                           | 0.91                                                        | 5        | 39                                | 20                                          |
| Hepatobiliary               | CISPGEMC(W)       | 37                                 | 14                                           | 0.59                                                        | 5        | 63                                | 23                                          |
| Hepatobiliary               | GEMC              | 26                                 | 5                                            | 0.46                                                        | 4        | 32                                | 8                                           |
| Hepatobiliary               | SORA              | 19                                 | 2                                            | 0.11                                                        | 1        | 43                                | 12                                          |
| Hodgkins Lymphoma           | ABVD              | 123                                | 31                                           | 0.41                                                        | 3        | 140                               | 41                                          |
| Hodgkins Lymphoma           | GDP               | 16                                 | 6                                            | 0.50                                                        | 4        | 19                                | 3                                           |
| Intermediate Grade Lymphoma | CHOP              | 24                                 | 10                                           | 0.67                                                        | 5        | 28                                | 12                                          |
| Intermediate Grade Lymphoma | CHOP+R            | 273                                | 95                                           | 0.52                                                        | 4        | 415                               | 157                                         |
| Intermediate Grade Lymphoma | GDP               | 23                                 | 9                                            | 0.48                                                        | 4        | 44                                | 22                                          |
| Low Grade Lymphoma          | BEND              | 10                                 | 3                                            | 0.40                                                        | 3        | 8                                 | 4                                           |
| Low Grade Lymphoma          | BEND+RITU         | 168                                | 37                                           | 0.30                                                        | 3        | 239                               | 57                                          |
| Low Grade Lymphoma          | CHOP+R            | 30                                 | 13                                           | 0.60                                                        | 5        | 17                                | 5                                           |
| Low Grade Lymphoma          | CVP+R             | 19                                 | 1                                            | 0.11                                                        | 1        | 14                                | 6                                           |
| Low Grade Lymphoma          | RITU              | 12                                 | 3                                            | 0.33                                                        | 3        | 19                                | 4                                           |
| Low Grade Lymphoma          | RITU(MNT)         | 238                                | 5                                            | 0.02                                                        | 1        | 297                               | 23                                          |
| Myelodysplastic syndrome    | AZCT              | 63                                 | 19                                           | 0.44                                                        | 4        | 69                                | 29                                          |
| Myelodysplastic syndrome    | LENA              | 10                                 | 3                                            | 0.40                                                        | 3        | 12                                | 1                                           |
| Melanoma                    | CRBPPACL          | 11                                 | 5                                            | 0.45                                                        | 4        | 20                                | 4                                           |
| Melanoma                    | DABR              | 24                                 | 5                                            | 0.21                                                        | 2        | 19                                | 5                                           |
| Melanoma                    | DCRB              | 42                                 | 16                                           | 0.48                                                        | 4        | 53                                | 12                                          |
| Melanoma                    | IFNA(IND-MNT(SC)) | 57                                 | 6                                            | 0.12                                                        | 1        | 49                                | 8                                           |
| Melanoma                    | IPIL              | 60                                 | 15                                           | 0.33                                                        | 3        | 66                                | 19                                          |
| Melanoma                    | TMZL              | 12                                 | 5                                            | 0.58                                                        | 5        | 0                                 | 0                                           |
| Melanoma                    | VEMU              | 24                                 | 4                                            | 0.17                                                        | 1        | 14                                | 2                                           |

| Cancer                    | Regimen      | Patients in the development cohort | Patients with AC30 in the development cohort | Mean acute care visits in 30 days in the development cohort | Quintile | Patients in the validation cohort | Patients with AC30 in the validation cohort |
|---------------------------|--------------|------------------------------------|----------------------------------------------|-------------------------------------------------------------|----------|-----------------------------------|---------------------------------------------|
| Myeloma                   | BMP          | 93                                 | 27                                           | 0.35                                                        | 3        | 188                               | 62                                          |
| Myeloma                   | BORT         | 84                                 | 25                                           | 0.39                                                        | 3        | 50                                | 12                                          |
| Myeloma                   | CYBORD       | 143                                | 39                                           | 0.44                                                        | 4        | 187                               | 64                                          |
| Myeloma                   | CYCL         | 19                                 | 3                                            | 0.16                                                        | 1        | 59                                | 20                                          |
| Myeloma                   | CYCL(PO)     | 22                                 | 8                                            | 0.50                                                        | 4        | 11                                | 6                                           |
| Myeloma                   | DEXALENA     | 170                                | 22                                           | 0.18                                                        | 1        | 132                               | 28                                          |
| Myeloma                   | DEXAPOMA     | 16                                 | 2                                            | 0.13                                                        | 1        | 11                                | 5                                           |
| Myeloma                   | LENA         | 79                                 | 11                                           | 0.18                                                        | 1        | 80                                | 7                                           |
| Myeloma                   | MELPPRED     | 16                                 | 3                                            | 0.25                                                        | 2        | 18                                | 3                                           |
| Neuroendocrine tumours    | CISPETOP(3D) | 15                                 | 7                                            | 0.53                                                        | 5        | 18                                | 5                                           |
| Neuroendocrine tumours    | OCTR         | 104                                | 20                                           | 0.22                                                        | 2        | 82                                | 10                                          |
| Nonsmall cell lung cancer | AFAT         | 17                                 | 5                                            | 0.35                                                        | 3        | 37                                | 9                                           |
| Nonsmall cell lung cancer | CISPETOP(3D) | 38                                 | 13                                           | 0.45                                                        | 4        | 47                                | 15                                          |
| Nonsmall cell lung cancer | CISPETOP(RT) | 123                                | 30                                           | 0.30                                                        | 3        | 137                               | 38                                          |
| Nonsmall cell lung cancer | CISPGEMC     | 72                                 | 26                                           | 0.50                                                        | 4        | 62                                | 28                                          |
| Nonsmall cell lung cancer | CISPPEME     | 97                                 | 35                                           | 0.59                                                        | 5        | 226                               | 75                                          |
| Nonsmall cell lung cancer | CISPVINO     | 74                                 | 17                                           | 0.31                                                        | 3        | 162                               | 37                                          |
| Nonsmall cell lung cancer | CISPVINO(W)  | 61                                 | 18                                           | 0.43                                                        | 4        | 45                                | 17                                          |
| Nonsmall cell lung cancer | CISPVNBL     | 38                                 | 17                                           | 0.53                                                        | 5        | 1                                 | 0                                           |
| Nonsmall cell lung cancer | CRBPETOP     | 48                                 | 18                                           | 0.65                                                        | 5        | 25                                | 13                                          |
| Nonsmall cell lung cancer | CRBPETOP(RT) | 14                                 | 5                                            | 0.50                                                        | 4        | 23                                | 6                                           |
| Nonsmall cell lung cancer | CRBPGEMC     | 152                                | 61                                           | 0.60                                                        | 5        | 107                               | 37                                          |
| Nonsmall cell lung cancer | CRBPPACL     | 54                                 | 10                                           | 0.20                                                        | 2        | 60                                | 23                                          |
| Nonsmall cell lung cancer | CRBPPEME     | 141                                | 50                                           | 0.49                                                        | 4        | 192                               | 53                                          |
| Nonsmall cell lung cancer | CRBPVINO     | 15                                 | 5                                            | 0.53                                                        | 5        | 54                                | 15                                          |
| Nonsmall cell lung cancer | CRBPVNBL     | 41                                 | 14                                           | 0.44                                                        | 4        | 0                                 | 0                                           |
| Nonsmall cell lung cancer | CRIZ         | 20                                 | 7                                            | 0.65                                                        | 5        | 20                                | 2                                           |

| Cancer                    | Regimen      | Patients in the development cohort | Patients with AC30 in the development cohort | Mean acute care visits in 30 days in the development cohort | Quintile | Patients in the validation cohort | Patients with AC30 in the validation cohort |
|---------------------------|--------------|------------------------------------|----------------------------------------------|-------------------------------------------------------------|----------|-----------------------------------|---------------------------------------------|
| Nonsmall cell lung cancer | DOCE         | 41                                 | 25                                           | 0.78                                                        | 5        | 49                                | 23                                          |
| Nonsmall cell lung cancer | ERLO         | 71                                 | 20                                           | 0.34                                                        | 3        | 69                                | 18                                          |
| Nonsmall cell lung cancer | GEFI         | 150                                | 22                                           | 0.19                                                        | 1        | 183                               | 23                                          |
| Nonsmall cell lung cancer | PEME         | 99                                 | 22                                           | 0.25                                                        | 2        | 164                               | 48                                          |
| Nonsmall cell lung cancer | VINO         | 10                                 | 3                                            | 0.40                                                        | 3        | 30                                | 14                                          |
| Ovarian                   | CRBP         | 55                                 | 19                                           | 0.47                                                        | 4        | 117                               | 31                                          |
| Ovarian                   | CRBPGEMC     | 24                                 | 5                                            | 0.29                                                        | 2        | 9                                 | 1                                           |
| Ovarian                   | CRBPPACL     | 279                                | 86                                           | 0.46                                                        | 4        | 369                               | 105                                         |
| Ovarian                   | CRBPPACL(IP) | 21                                 | 7                                            | 0.48                                                        | 4        | 19                                | 6                                           |
| Ovarian                   | GEMC         | 17                                 | 4                                            | 0.41                                                        | 3        | 24                                | 8                                           |
| Ovarian                   | PACL(W)      | 23                                 | 7                                            | 0.57                                                        | 5        | 45                                | 8                                           |
| Ovarian                   | PGLDX        | 56                                 | 18                                           | 0.48                                                        | 4        | 66                                | 27                                          |
| Pancreas                  | FOLFIRINOX   | 136                                | 52                                           | 0.57                                                        | 5        | 184                               | 80                                          |
| Pancreas                  | FU(CIV-RT)   | 12                                 | 1                                            | 0.08                                                        | 1        | 11                                | 2                                           |
| Pancreas                  | GEMC         | 158                                | 47                                           | 0.46                                                        | 4        | 209                               | 69                                          |
| Pancreas                  | GEMCNPAC(W)  | 33                                 | 17                                           | 0.79                                                        | 5        | 80                                | 36                                          |
| Prostate                  | ABIRPRED     | 249                                | 33                                           | 0.16                                                        | 1        | 269                               | 56                                          |
| Prostate                  | DOCE         | 91                                 | 32                                           | 0.54                                                        | 5        | 15                                | 9                                           |
| Prostate                  | DOCEPRED     | 98                                 | 37                                           | 0.46                                                        | 4        | 199                               | 50                                          |
| Prostate                  | ENZL         | 136                                | 18                                           | 0.16                                                        | 1        | 181                               | 27                                          |
| Renal                     | EVER         | 15                                 | 2                                            | 0.13                                                        | 1        | 20                                | 5                                           |
| Renal                     | PAZO         | 32                                 | 10                                           | 0.50                                                        | 4        | 20                                | 7                                           |
| Renal                     | SUNI         | 76                                 | 17                                           | 0.28                                                        | 2        | 131                               | 29                                          |
| Small cell lung cancer    | CISPETOP(3D) | 103                                | 34                                           | 0.44                                                        | 4        | 140                               | 51                                          |
| Small cell lung cancer    | CRBPETOP     | 116                                | 40                                           | 0.48                                                        | 4        | 156                               | 61                                          |
| Small cell lung cancer    | ETOP(PO)     | 12                                 | 3                                            | 0.25                                                        | 2        | 2                                 | 0                                           |
| Small bowel appendix      | MFOLFOX6     | 25                                 | 4                                            | 0.20                                                        | 2        | 19                                | 4                                           |

| Cancer              | Regimen      | Patients in the development cohort | Patients with AC30 in the development cohort | Mean acute care visits in 30 days in the development cohort | Quintile | Patients in the validation cohort | Patients with AC30 in the validation cohort |
|---------------------|--------------|------------------------------------|----------------------------------------------|-------------------------------------------------------------|----------|-----------------------------------|---------------------------------------------|
| Unknow primary site | CISPETOP(3D) | 10                                 | 5                                            | 0.50                                                        | 4        | 4                                 | 0                                           |
| Unknow primary site | CRBPPACL     | 12                                 | 9                                            | 1.17                                                        | 5        | 27                                | 8                                           |
| Uterus              | CRBP         | 33                                 | 5                                            | 0.15                                                        | 1        | 28                                | 6                                           |
| Uterus              | CRBPPACL     | 185                                | 43                                           | 0.29                                                        | 3        | 224                               | 54                                          |
| Uterus              | DOXO         | 11                                 | 5                                            | 0.64                                                        | 5        | 12                                | 3                                           |

AC30: Acute care use within 30 days.
